# Supplementary material for: An integrated framework for building trustworthy data-driven epidemiological models: Application to the COVID-19 outbreak in New York City
Source: PLOS journal article supplement (doi:10.1371/journal.pcbi.1009334), 2021-09-08
Supplement: S3 (10.1371/journal.pcbi.1009334.s003) [file journal.pcbi.1009334.s003]

**S3 Text. Basic and control reproduction number of the model in Fig 3 in the main text.** The reproduction number in Eq. (5) in the main text is obtained using the next generation matrix operator described in [1]. The vector of infected state variables without considering hospitalization is denoted by  $\mathbf{x} = (E, P, I, A)$ . We define  $F = \left[ \frac{\partial \mathcal{F}_i(x_0)}{\partial x_j} \right]$  and  $V = \left[ \frac{\partial \mathcal{V}_i(x_0)}{\partial x_j} \right]$ , where  $\mathcal{F}_i$  is the rate of appearance of new infections in the  $i$ th compartment;  $\mathcal{V}_i = \mathcal{V}_i^- - \mathcal{V}_i^+$ , where  $\mathcal{V}_i^+$  is the rate of transfer of individuals into the  $i$ th compartment by all other means except for infection, and  $\mathcal{V}_i^-$  is the rate of transfer of individuals out of the  $i$ th compartment; and

$$x_0 = (S := 1, E := 0, P := 0, I := 0, A := 0, H := 0, Q := 0, D := 0, R := 0)$$

is the disease-free equilibrium state of the system. We have

$$F = \begin{pmatrix} 0 & \beta\epsilon & \beta & \beta\epsilon \\ 0 & 0 & 0 & 0 \\ 0 & 0 & 0 & 0 \\ 0 & 0 & 0 & 0 \end{pmatrix} \quad \text{and} \quad V = \begin{pmatrix} d_E & 0 & 0 & 0 \\ -d_E & d_P & 0 & 0 \\ 0 & -d_P\delta & d_I & 0 \\ 0 & -d_P(1-\delta) & 0 & d_A \end{pmatrix}.$$

Then,

$$FV^{-1} = \begin{pmatrix} \beta \left( \frac{\epsilon(d_A - \delta d_P + d_P)}{d_A d_P} + \frac{\delta}{d_I} \right) & \beta \left( \frac{\epsilon(d_A - \delta d_P + d_P)}{d_A d_P} + \frac{\delta}{d_I} \right) & \frac{\beta}{d_I} & \frac{\beta\epsilon}{d_A} \\ 0 & 0 & 0 & 0 \\ 0 & 0 & 0 & 0 \\ 0 & 0 & 0 & 0 \end{pmatrix}.$$

Let  $\rho(FV^{-1})$  denote the dominant eigenvalue of  $FV^{-1}$ . The control reproduction number is given by  $\mathcal{R}_c = \rho(FV^{-1})$ .

## References

1. Diekmann O, Heesterbeek JAP, Metz JAJ. On the definition and the computation of the basic reproduction ratio  $R_0$  in models for infectious diseases in heterogeneous populations. *Journal of Mathematical Biology*. 1990; 28(4):365–382. doi:10.1007/BF00178324.
