# Supplementary material for: An integrated framework for building trustworthy data-driven epidemiological models: Application to the COVID-19 outbreak in New York City
Source: PLOS journal article supplement (doi:10.1371/journal.pcbi.1009334), 2021-09-08
Supplement: S10 (10.1371/journal.pcbi.1009334.s010) [file journal.pcbi.1009334.s010]

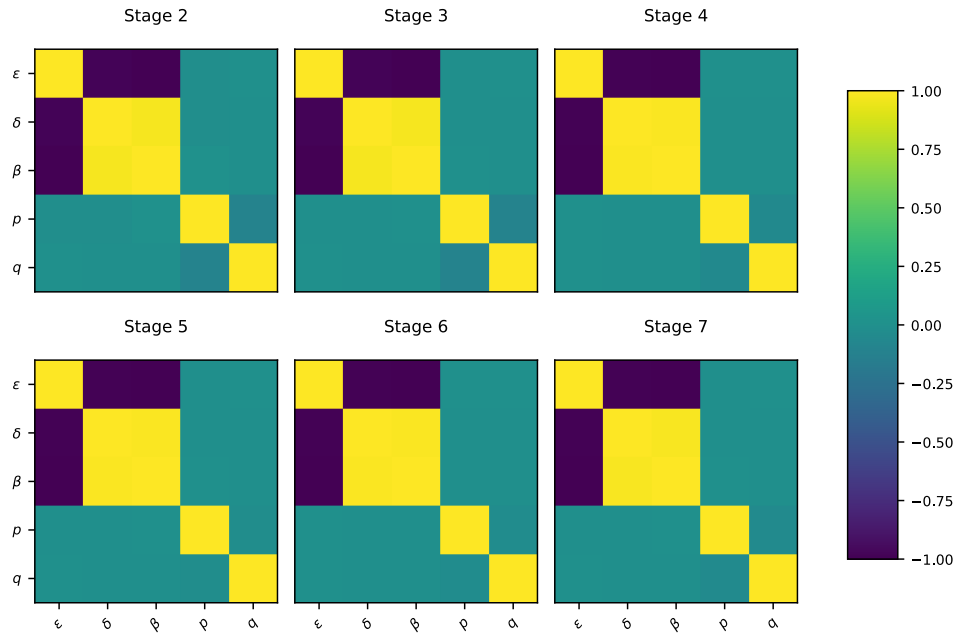

**S2 Fig. Correlation matrix of  $\beta$ ,  $p$ ,  $q$ ,  $\delta$ , and  $\epsilon$  in Stage 2 to Stage 7.** Green means (almost) not statistically correlated while yellow/purple represents positively/negatively correlated. The correlation matrices are similar in these stages, i.e., there is always correlation between  $\beta, \epsilon, \delta$  while there is no correlation between  $p, q$  and the other parameters.
