# Supplementary material for: An integrated framework for building trustworthy data-driven epidemiological models: Application to the COVID-19 outbreak in New York City
Source: PLOS journal article supplement (doi:10.1371/journal.pcbi.1009334), 2021-09-08
Supplement: S15 (10.1371/journal.pcbi.1009334.s015) [file journal.pcbi.1009334.s015]

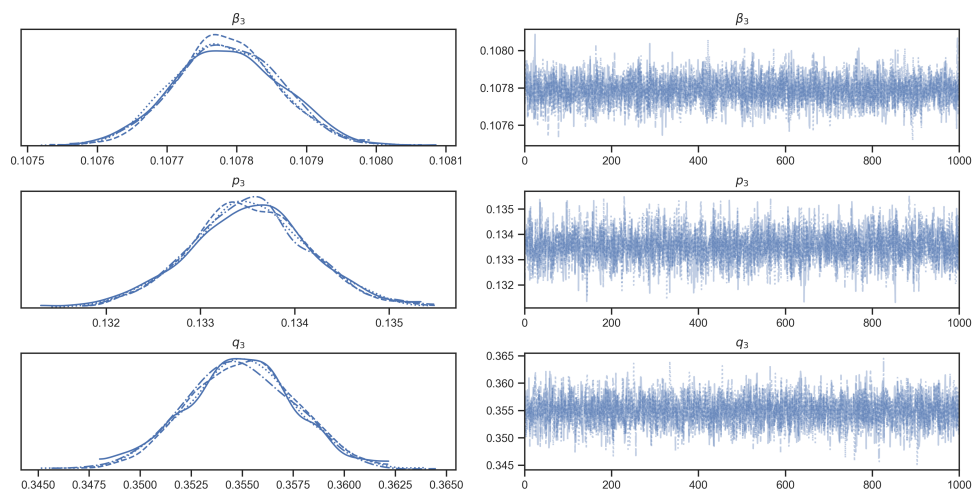

**S7 Fig.** MCMC simulation in Stage 3. Other settings are the same as S5 Fig.
