# Supplementary material for: An integrated framework for building trustworthy data-driven epidemiological models: Application to the COVID-19 outbreak in New York City
Source: PLOS journal article supplement (doi:10.1371/journal.pcbi.1009334), 2021-09-08
Supplement: S17 (10.1371/journal.pcbi.1009334.s017) [file journal.pcbi.1009334.s017]

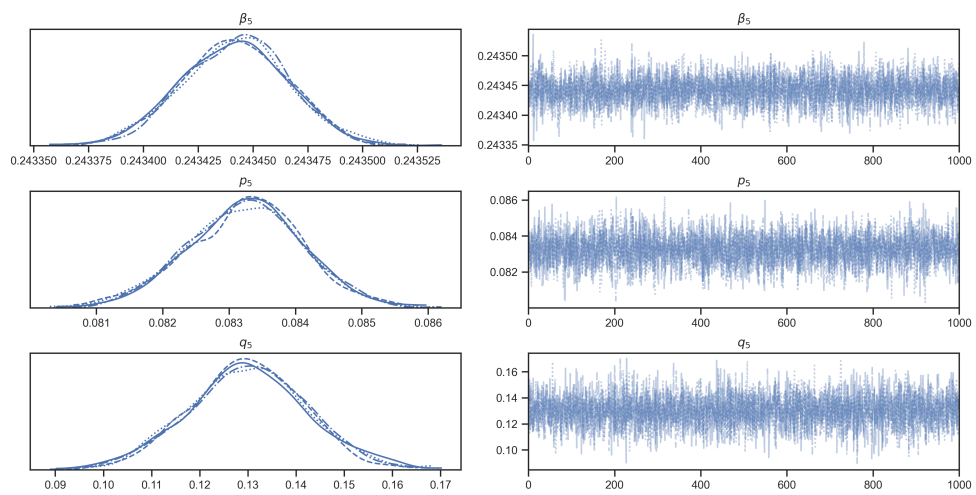

**S9 Fig.** MCMC simulation in Stage 5. Other settings are the same as S5 Fig.
